## Corrigendum to: 'Modelling the Hafnium–Neodymium Evolution of Early Earth: A Study from West Greenland'

*Journal of Petrology* 2019, Volume 60, pages 177–197,  
doi: 10.1093/petrology/egy110

Nicholas J. Gardiner<sup>1,2,\*§</sup>, Tim E. Johnson<sup>1,3</sup>, Christopher L. Kirkland<sup>1,2§</sup>  
and Kristoffer Szilas<sup>4</sup>

<sup>1</sup>School of Earth and Planetary Sciences, Curtin University, <sup>§</sup>(Centre for Exploration Targeting—Curtin Node), Perth, Australia; <sup>2</sup>Australian Research Council Centre of Excellence for Core to Crust Fluid Systems, Australia; <sup>3</sup>State Key Lab of Geological Processes and Mineral Resources, China University of Geosciences, Wuhan, China; <sup>4</sup>Department of Geosciences and Natural Resource Management, University of Copenhagen, Øster Voldgade 10, 1350 Copenhagen K, Denmark

\*Corresponding author. Present address: School of Earth, Atmosphere and Environment, Monash University, Victoria 3800, Australia. Telephone: +61 (0) 3 9905 4879. Fax: +61 (0) 3 9905 4903. E-mail: -nick.gardiner@monash.edu. Fax: +39 0116705128.

In the published version of the paper, [Table 1](#) shows the major element compositions of the starting compositions used in phase equilibrium modelling in terms of weight percent oxides, which does not permit the phase diagrams (Figs 1 & 2) to be reproduced. The revised [Table 1](#) provides these compositions in terms of mol.% oxides in the chemical systems of interest (NCFMASCrO and NCKFMASHTO, respectively; see main text). The revised Table and caption are provided below.

**Table 1:** Input bulk major element compositions (mol.%) used for phase equilibria modelling. The average Isua basalt composition was calculated using the mean composition of nine meta-basalt analyses (Hoffmann *et al.*, 2011b), excluding one analysis with high K<sub>2</sub>O and one with anomalously high Sm/Nd. The composition of DMM is based on Workman and Hart (2005), and for PUM on McDonough and Sun (1995)

| mol%                           | DMM    | PUM    | Isua basalt |
|--------------------------------|--------|--------|-------------|
| Na <sub>2</sub> O              | 0.110  | 0.301  | 1.844       |
| CaO                            | 2.914  | 3.276  | 9.552       |
| K <sub>2</sub> O               |        |        | 0.177       |
| FeO                            | 5.928  | 5.850  | 9.679       |
| MgO                            | 50.000 | 48.963 | 18.437      |
| Al <sub>2</sub> O <sub>3</sub> | 2.036  | 2.274  | 4.746       |
| SiO <sub>2</sub>               | 38.719 | 39.106 | 48.093      |
| TiO <sub>2</sub>               |        |        | 0.618       |
| Cr <sub>2</sub> O <sub>3</sub> | 0.190  | 0.130  |             |
| O                              | 0.100  | 0.100  | 0.481       |
| H <sub>2</sub> O               |        |        | 6.374       |
